# Supplementary material for: Evaluation of leaf rust resistance in the Chinese wheat cultivar ‘Een1’
Source: PeerJ journal article supplement (doi:10.7717/peerj.8993), 2020-05-29
Supplement: Fig._S1__Phenotypes_for_some_of_the_tested_materials.pdf [file Fig._S1__Phenotypes_for_some_of_the_tested_materials.pdf]

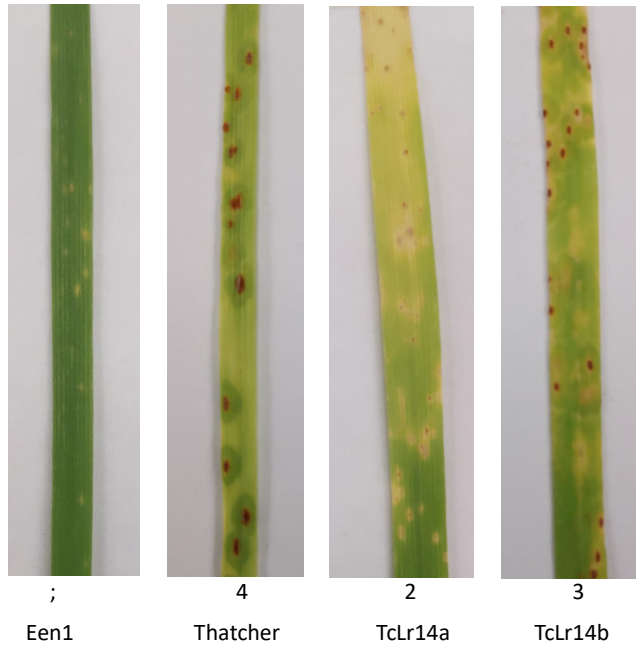

**Fig. 1** Phenotypes for some of the tested materials
